# Supplementary material for: Senescence is a Spi1-induced anti-proliferative mechanism in primary hematopoietic cells
Source: PubMed Central journal article supplement — Haematologica. 2017 Sep 14;102(11):1850–60. doi: 10.3324/haematol.2016.157636 (PMC5664389; doi:10.3324/haematol.2016.157636), 2017-11
Supplement: 2016_157636-Disclosures_and_Contributions.pdf [file 2016_157636-Disclosures_and_Contributions.pdf]

Haematologica  
HAEMATOL/2016/157636  
Version 5

Senescence is a Spi1/PU.1-induced anti-proliferative mechanism in primary hematopoietic cells

Laure Delestré, Cui Hengxiang, Michela Esposito, Cyril Quiveron, Elena Mylonas, Virginie Penard-Lacronique, Oliver Bischof, and Christel Guillouf

Disclosures: This work was supported by the Fondation de France, Inserm, the Institut National du Cancer (INCa-DGOS-INSERM 6043 and PL-BIO-06), ITMO Cancer de l'alliance nationale pour les sciences de la vie et de la santé (AVIESAN), Section régionale de la Ligue Nationale contre le Cancer. L. Delestré was supported by AVIESAN and Fondation de France; H. Cui by Cancéropole Ile-de-France; M. Esposito by the Institut National du Cancer (PL-BIO-06). Quiveron and E. Mylonas by a CDI-Mission (Institut Gustave Roussy). we declare no conflict of interest

Contributions: H.C. and L.D. designed, performed the experiments and analyzed the data; E.M, M.E. and C.Q. performed the experiments; V.P.L. and O.B. designed the research and wrote the paper; C.G. designed the research, analyzed the data and wrote the paper.
